# Supplementary material for: A Case-Control Study on Maternal caffeine intake during Pregnancy and Risk of Low Birth Weight in Wolaita zone, Southern Ethiopia
Source: Research Square preprint supplement (doi:10.21203/rs.3.rs-113435/v1), 2020-12-04
Supplement: Supplementary file 1 [file 054137fbfb7fce13c9f3f406.docx]

# A Case-Control Study on Maternal caffeine intake during Pregnancy and Risk of Low Birth Weight in Wolaita zone, Southern Ethiopia

**Authors name:** Leila Hussena, BlenKasshuna,

**Author affiliations**

awolaita sodo University, college of Health science and Medicine, Sodo, South, Ethiopia

**Authors E-mail:** Leila Hussen leilahussen66@gmail.com

Blen Kasshun Desu blenkas2000@yahoo.com

**Correspondence:** Leila Hussen

Cell phone + 251 934508036

E-mail leilahussen66@gmail.com

[Leila.hussen@wsu.edu.et](mailto:Leila.hussen@wsu.edu.et)

P.O. Box 138

Wolaita Sodo University

Ethiopia

**Questionnaire:**

This questionnaire is prepared to collect information on mothers and their newborns socio-demographic, obstetric, maternal dietary habit, health facility utilization, morbidity, and iron folate supplementation and anthropometric characteristics.

| exclusion criteria   - Is the child free of any visible major congenital anomalies 1. Yes 2. No - Is the gestational age of the pregnancy known? 1. Yes 2. No - Is the mother have chronic illness(diabetes mellitus, hypertension)   If “yes” to any of the exclusion criteria, stop the data collection. | | | | | | | | | | | | | | | | | |
| --- | --- | --- | --- | --- | --- | --- | --- | --- | --- | --- | --- | --- | --- | --- | --- | --- | --- |
| Health facility type/code | | | | | | |  | | | | | | | | | | |
| **Section I. Newborn’s characteristics** | | | | | | | | | | | | | | | | | |
| **S.N** | | **Questions** | | | | | **Answers** | | | | | | | **Skip to** | | | |
| 101 | | Birth weight of the baby in grams | | | | | ____________ grams | | | | | | |  | | | |
| 102 | | What is the sex of the newborn? | | | | | 1. Male 2. Female | | | | | | |  | | | |
| **Section II. Sociodemographic characteristics of the mother** | | | | | | | | | | | | | | | | | |
| 201 | | How old are you? | | | | | | Age in completed years ______ | | | | | | |  | | |
| 202 | | What is your current marital status? | | | | | | 1. Single 2. Married 3. Divorced/separated 4. Widowed | | | | | | |  | | |
| 203 | | What is your husband occupation | | | | | | . Farmer  2. Merchant  3. Government /private employee  4. Daily laborer  5.Other (specify | | | | | | |  | | |
| 203 | | What is your educational status? | | | | | | 1No formal education   1. Primary education (1-8) 2. Secondary education (9-12) 3. College and above | | | | | | |  | | |
| 204 | | What is your occupation? | | | | | | 1. Housewife 2. Government employee 3. Private employee 4. Merchant 5. Other (specify)__________ | | | | | | |  | | |
| 205 | | Where is your residence? | | | | | | 1. Rural 2. Urban | | | | | | |  | | |
| 206 | | How much is the monthly income of the household in Ethiopian birr? | | | | | | ___________________ | | | | | | |  | | |
| **Section III. maternal obstetric characteristics** | | | | | | | | | | | | | | | | | |
| 301 | How many times did you give birth? | | | | | | | | | 1. First time 2. Twice 3. Three times 4. Four times 5. Five and above | | | | |  | | |
| 302 | What is the time interval between the current baby and his/her immediate elder? | | | | | | | | | 1. Primipara 2. _______ months | | | | |  | | |
| 303 | Have you ever had a pregnancy that ended up in miscarriage before 7 months? | | | | | | | | | 1. Yes 2. No | | | | |  | | |
| 305 | Have you had a small baby in previous births? | | | | | | | | | 1. Yes 2. No | | | | |  | | |
| **Section IV. Maternal morbidity characteristics** | | | | | | | | | | | | | | | | | |
| 401 | During this pregnancy, do you have any diagnosed health problem? | | | | | | | | | 1. Yes 2. No | | | | |  | | |
| 402 | During this pregnancy, did you have the symptoms of dizziness, fast heart beat, shortness of breath, pale skin and fatigue? | | | | | | | | | 1. Yes 2. No | | | | |  | | |
| 403 | Have you had abnormal medical conditions during this pregnancy? | | | | | | | | | 1. Yes 2. No | | | | |  | | |
| 404 | Have you ever had malaria | | | | | | | | | 1.Yes  2.No | | | | |  | | |
| **Section V. Health facility related characteristics** | | | | | | | | | | | | | | | | | |
| 501 | Did you visit any health facility for ANC service for the current pregnancy? | | | | | | | | | 1. Yes 2. No | | | | |  | | |
| 502 | How many times did you receive ANC during your current pregnancy? | | | | | | | | | ________ times | | | | |  | | |
| 503 | How many months pregnant were you when you first received ANC service for your current pregnancy? | | | | | | | | | _________ months | | | | |  | | |
| **Section VI. Dietary habit and iron folate supplementation** | | | | | | | | | | | | | | | | | |
| 601 | During the current pregnancy, did you take any additional meal than usual? | | | | | | | | | 1. Yes 2. No | | | | |  | | |
| 602 | During your current ANC visit did you get dietary counseling? | | | | | | | | | 1.Yes  2.No | | | | |  | | |  |
| 603 | During this pregnancy, did you receive any iron folate tablets? [show commonest local types of tablets] | | | | | | | | | 1. Yes 2. No | | | | | If no, skip to Q 701 | | |
| 604 | Did you take/consume the tablets? | | | | | | | | |  | | | | |  | | |
| 605 | How many iron tablets did you take? | | | | | | | | | __________ tablets | | | | |  | | |
| **Section VII. Dietary intake characteristics** | | | | | | | | | | | | | | | | | |
| **Food type** | | | **Daily** | | **4-6*/week** | | | | **1-3*/week** | | **1-3*/month** | | **Once/month** | | | | **Never** |
| **Cereals** | | | | | | | | | | | | | | | | | |
| Barely flour roasted | | |  | |  | | | |  | |  | |  | | | |  |
| Porridge | | |  | |  | | | |  | |  | |  | | | |  |
| Maize boiled | | |  | |  | | | |  | |  | |  | | | |  |
| Maize roasted | | |  | |  | | | |  | |  | |  | | | |  |
| Maize unleavened bread | | |  | |  | | | |  | |  | |  | | | |  |
| Enjera | | |  | |  | | | |  | |  | |  | | | |  |
| Bread | | |  | |  | | | |  | |  | |  | | | |  |
| **Roots and tubers** | | | | | | | | | | | | | | | | | |
| False banana root baked | | |  | |  | | | |  | |  | |  | | | |  |
| Refined f. banana porridge | | |  | |  | | | |  | |  | |  | | | |  |
| Sweet potato boiled | | |  | |  | | | |  | |  | |  | | | |  |
| Potato sauce | | |  | |  | | | |  | |  | |  | | | |  |
| Yam boiled | | |  | |  | | | |  | |  | |  | | | |  |
| Maize+false banana baked | | |  | |  | | | |  | |  | |  | | | |  |
| **Legumes** | | | | | | | | | | | | | | | | | |
| Chick pea roasted | | |  | |  | | | |  | |  | |  | | | |  |
| Chick pea sauce | | |  | |  | | | |  | |  | |  | | | |  |
| Pea flour sauce | | |  | |  | | | |  | |  | |  | | | |  |
| Lentil sauce | | |  | |  | | | |  | |  | |  | | | |  |
| **Dairy products** | | | | | | | | | | | | | | | | | |
| Fresh cow’s milk | | |  | |  | | | |  | |  | |  | | | |  |
| Butter cow’s milk | | |  | |  | | | |  | |  | |  | | | |  |
| Sour cow’s milk | | |  | |  | | | |  | |  | |  | | | |  |
| Cottage cow’s cheese | | |  | |  | | | |  | |  | |  | | | |  |
| **Meat** | | | | | | | | | | | | | | | | | |
| Raw beef minced | | |  | |  | | | |  | |  | |  | | | |  |
| Beef liver raw | | |  | |  | | | |  | |  | |  | | | |  |
| Beef raw | | |  | |  | | | |  | |  | |  | | | |  |
| Beef grilled | | |  | |  | | | |  | |  | |  | | | |  |
| Tripe beef raw | | |  | |  | | | |  | |  | |  | | | |  |
| Chicken roasted | | |  | |  | | | |  | |  | |  | | | |  |
| **Fish** | | | | | | | | | | | | | | | | | |
| Fish boiled | | |  | |  | | | |  | |  | |  | | | |  |
| **Vegetables** | | | | | | | | | | | | | | | | | |
| Kale boiled | | |  | |  | | | |  | |  | |  | | | |  |
| Cabbage boiled | | |  | |  | | | |  | |  | |  | | | |  |
| Swiss chard boiled | | |  | |  | | | |  | |  | |  | | | |  |
| Pumpkin boiled | | |  | |  | | | |  | |  | |  | | | |  |
| Tomato boiled | | |  | |  | | | |  | |  | |  | | | |  |
| **Fruits** | | | | | | | | | | | | | | | | | |
| Avocado | | |  | |  | | | |  | |  | |  | | | |  |
| Banana | | |  | |  | | | |  | |  | |  | | | |  |
| Guava | | |  | |  | | | |  | |  | |  | | | |  |
| Lemon | | |  | |  | | | |  | |  | |  | | | |  |
| Mango | | |  | |  | | | |  | |  | |  | | | |  |
| Orange | | |  | |  | | | |  | |  | |  | | | |  |
| Papaya | | |  | |  | | | |  | |  | |  | | | |  |
| Pineapple | | |  | |  | | | |  | |  | |  | | | |  |
| **Nuts** | | | | | | | | | | | | | | | | | |
| Peanut roasted | | |  | |  | | | |  | |  | |  | | | |  |
| **Egg** | | | | | | | | | | | | | | | | | |
| Egg whole boiled | | |  | |  | | | |  | |  | |  | | | |  |
| Egg whole fried with fat | | |  | |  | | | |  | |  | |  | | | |  |
| **Section VIII.Habitual coffee consumption** | | | | | | | | | | | | | | | | | |
| Have you drank  Coffee in the last 24-hours? | | | | 1.Yes  2.No | | | | | | | |  | | | | | |
| Where you drank it? | | | | 1.athome 2.Outside  3.Machine prepared | | | | | | | |  | | | | | |
| During the last 24 hours, how many times did you prepared coffee | | | | _______times | | | | | | | |  | | | | | |
| Which serving size you used? | | | |  | | | | | | | | **(show the picture and** **circle the corresponding code)** | | | | | |
| How many serving sizes did you have in the last 24 hours . | | | |  | | | | | | | |  | | | | | |
| **Section IV.Anthropometric characteristics of the study participants** | | | | | | | | | | | | | | | | | |
| **S.N** | | **Question** | | | | **Answer** | | | | | | | | | | **Remark** | |
| 801 | | MUAC of the mother | | | | __________ centimeters | | | | | | | | | |  | |
|  | | Maternal height in cm | | | | __________ centimeters | | | | | | | | | |  | |
| Maternal Weight in kg | | | | __________ kilogram | | | | | | | | | |  | |
